# Supplementary material for: Untargeted metabolomic analyses of fermented unpolished black rice with melanogenesis inhibition activity
Source: PeerJ. 2025 Jun 4;13:e19533. doi: 10.7717/peerj.19533 (PMC12145086; doi:10.7717/peerj.19533)
Supplement: Supplemental Information 5 [file peerj-13-19533-s005.xlsx]

## Sheet: Sheet1
	UnFR1	UnFR2	UnFR3	FR1	FR2	FR3
label	UnFR	UnFR	UnFR	FR	FR	FR
Ribopyranose	0	0	0	2.93024e+06	2.88062e+06	4.41502e+06
Xylitol	466766	844622	1.01438e+06	1.04134e+06	1.01394e+06	1.58722e+06
Arabinose	355345	619674	752056	153544759	119124748	5.40592e+07
Psicofuranose	1.56732e+06	2.82245e+06	3.37929e+06	0	0	0
Fructose	2.42789e+06	5.15936e+06	6.39858e+06	0	0	0
Galactopyranose	0	0	0	343344	5.67127e+07	9.37173e+07
Glucose	1.03941e+07	1.32192e+07	1.55136e+07	3.39012e+08	3.69347e+08	4.74617e+08
Glucopyranose	679971	741857	889114	0	0	0
Galactose oxime	9.81208e+06	1.4922e+07	1.77999e+07	68033	1.5478e+06	1.48687e+06
Myo-Inositol	2.43705e+06	2.00815e+06	2.40001e+06	2.47911e+07	2.61109e+07	3.66728e+07
Cellobiose	0	0	0	55867.1	521672	853626
Trehalose	0	0	0	7.12315e+06	5.69835e+06	7.00785e+06
Lactose	0	0	0	1.16111e+07	5.35938e+06	6.99148e+06
Mannobiose	0	0	0	5.90201e+06	1.22019e+07	1.51174e+07
Gentiobiose	0	0	0	5.4346e+06	2.25481e+07	3.03206e+07
Palatinose	0	0	0	1.31206e+06	1.97439e+07	2.81393e+07
Melibiose	0	0	0	3.05423e+07	1.85035e+07	1.85035e+07
Alanine	428041	208901	198837	2.07223e+06	2.35606e+06	3.49189e+06
Valine	92734.8	568367	130507	514429	613931	985448
Leucine	108050	279257	228268	885971	1.07242e+06	1.55998e+06
Proline	130698	122231	150645	697279	568294	1.05038e+06
Serine	228412	64331.1	70264.3	912413	911936	1.31689e+06
Aspartic acid	3.16554e+06	78167	81055.2	1.39303e+06	1.14017e+06	1.63747e+06
Gamma-aminobutyric acid	223583	166735	153040	223760	173111	237211
Threonine	110407	94728.4	95164.8	217880	173111	395819
Phenylalanine	386702	165162	264298	2.08064e+06	2.26298e+06	3.2504e+06
Lactic Acid	876143	1.31836e+06	1.1921e+06	8.01985e+07	9.39213e+07	124849266
Acetic acid	138613	155373	172656	432526	483405	670749
Succinic acid	62000.4	107874	127619	1.72982e+07	1.72899e+07	2.49957e+07
Fumaric acid	51035.6	60332.8	73966.9	0	0	0
Salicylic acid	23023.7	86865.2	82435	0	0	0
Citric acid	7.05039e+06	6.53219e+06	7.52328e+06	61903	1.21456e+06	1.9884e+06
Hydroxyglutaric acid	0	0	0	1.27665e+06	1.28093e+06	1.98805e+06
Glyceric acid	88958	77125.4	90767	637516	599543	999502
Phosphoric acid	1.52918e+07	1.71896e+07	1.86596e+07	7.31124e+07	7.72624e+07	1.05099e+08
Phenyllactic acid	0	0	0	768736	787045	1.08712e+06
Tartronic acid	0	0	0	5.64097e+06	5.53463e+06	8.62242e+06
Levoglucosan	0	0	0	934266	943358	1.3447e+06
Pyruvic acid	0	0	0	85102.4	115252	119463
Vanillic acid	539322	2.05401e+06	2.34708e+06	1.32794e+06	287563	560013
Protocatechoic acid	1.56388e+06	4.28564e+06	5.47181e+06	250653	286087	395078
Hydroxybenzoic acid	0	0	0	768480	614317	1.05918e+06
Myristic acid	20921	20365	32807	83080.1	28639	178320
Palmitic Acid	116946	290270	494206	397859	106913	717237
Linoleic acid	290270	149859	322727	56700	55900.1	50540
Oleic Acid	0	0	0	100316	100342	91336.9
Stearic acid	77285.9	15018	32902	83094	21856	195074
