# Supplementary material for: Untargeted metabolomic analyses of fermented unpolished black rice with melanogenesis inhibition activity
Source: PeerJ. 2025 Jun 4;13:e19533. doi: 10.7717/peerj.19533 (PMC12145086; doi:10.7717/peerj.19533)
Supplement: Supplemental Information 6 [file peerj-13-19533-s006.xlsx]

## Sheet: Figure 1
	FUBRS		DPPH radical scavenging activity (% of control)									FUBRS		ABTS+ scavenging capacity (% of control)
	no sample (control)		0	0	0							no sample (control)		0	0	0
	0.5%		5.88235	1.2605	5.04202							0.5%		1.51229	0.756144	5.66011
	1%		15.6109	13.5747	14.4796							1%		5.86011	10.7751	6.99433
	2.5%		15.3846	14.0272	16.0633							2.5%		15.3119	14.9338	15.1229
	5%		27.3109	26.4706	25.113							5%		28.9225	31.1909	27.4102
	Un-FR		DPPH radical scavenging activity (% of control)									Un-FR		ABTS+ scavenging capacity (% of control)
	no sample (control)		0	0	0							no sample (control)		0	0	0
	0.5%		0	3.61991	4.97738							0.5%		9.07372	7.75047	6.80529
	1%		7.69231	9.50226	12.4434							1%		18.9036	17.5803	17.0132
	2.5%		20.362	21.267	21.4932							2.5%		35.5388	34.2155	33.0813
	5%		37.3303	40.8142	42.8669							5%		57.6559	56.5217	55.5766

## Sheet: Figure 2
	FUBRS		Mushroom tyrosinase inhibition activity (% of control)
	no sample (control)		0	0	0
	Undilute		92.9578	92.9578	91.7355
	1:2		61.2676	59.8591	61.157
	1:4		27.2727	27.2727	30
	Un-FR		Mushroom tyrosinase inhibition activity (% of control)
	no sample (control)		0	0	0
	Undilute		59.5041	57.0248	60
	1:2		36.6197	45.4545	46.281
	1:4		28.8732	29.5775

## Sheet: Figure 3
	Treatment	Relative melanogenesis inhibition (% of untreated)
	Untreated	0	0	0
	Kojic	39.919	45	35.0121
	Un-FR	-11.0457	-11.9293	-14.9865
	FUBRS 1%	29.6749	26	27.1155
	FUBRS 2.5%	31.9052	37.4994	41
	FUBRS 5%	62.6664	57.2271	66.0151
