# Supplementary material for: Untargeted metabolomic analyses of fermented unpolished black rice with melanogenesis inhibition activity
Source: PeerJ journal article supplement (doi:10.7717/peerj.19533), 2025-06-04
Supplement: Supplemental_Figure_S1.pdf [file Supplemental_Figure_S1.pdf]

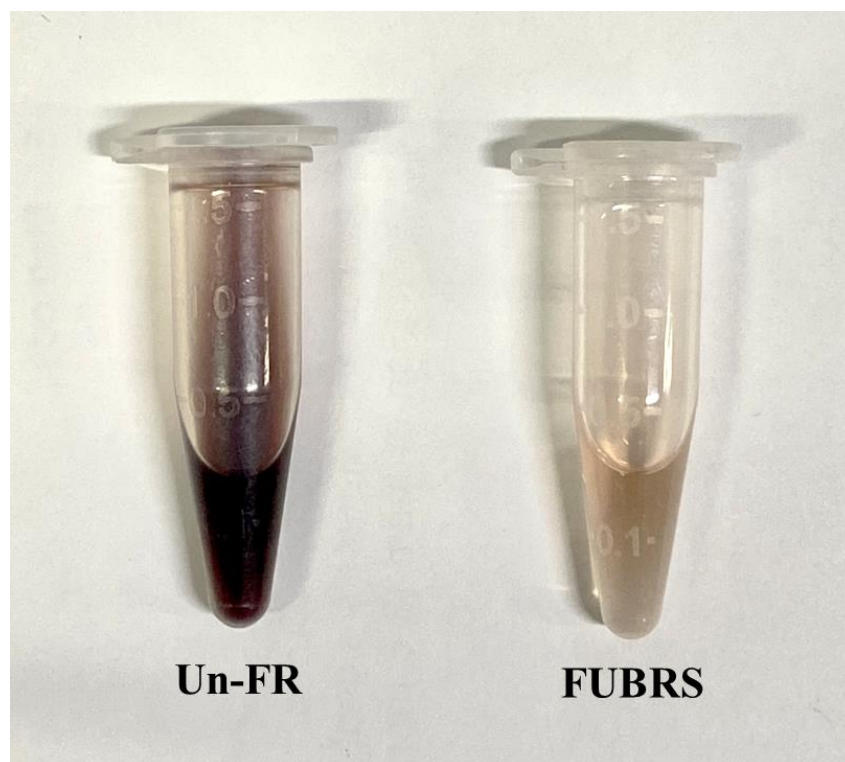

**Supplemental Figure S1: Characteristics of the Un-FR and FUBRS**
