# Supplementary material for: Untargeted metabolomic analyses of fermented unpolished black rice with melanogenesis inhibition activity
Source: PeerJ journal article supplement (doi:10.7717/peerj.19533), 2025-06-04
Supplement: Supplemental_Figure_S2.pdf [file Supplemental_Figure_S2.pdf]

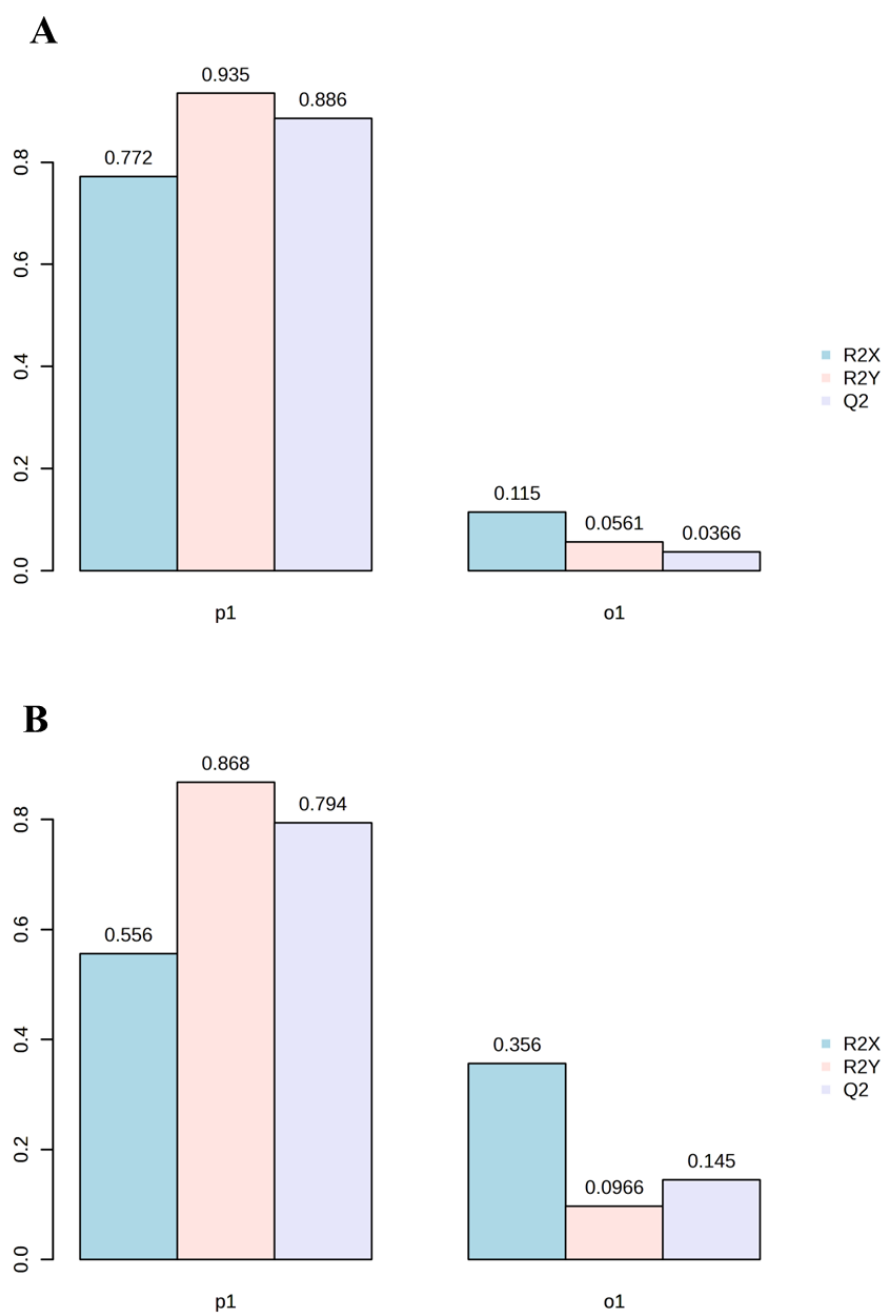

**Supplemental Figure S2: The OPLS-DA permutation of (A) metabolites and (B) fatty acids using the GC-MS data.** Note: R2X, R2Y represent the model interpretation rate; Q2 indicates the model predictive ability. The closer R2Y and Q2 are to 1 the more stable and reliable is the model.
